# Supplementary material for: Opportunities and Barriers to Monitoring and Evaluating Management Effectiveness in Protected Areas within the Kruger to Canyons Biosphere Region, South Africa
Source: MDPI journal article supplement (doi:10.3390/su15075838), 2023-03-28
Supplement: s1 [file s1]

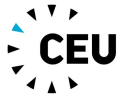

## Protected Area Management Effectiveness in K2C

### Introduction

Thank you for your willingness to contribute time to my research on Protected Area Management Effectiveness in K2C. The following questionnaire should take you approximately 10 – 15 minutes and includes questions on the background of your Protected Area, management planning, use of adaptive management, and the monitoring/evaluation of management effectiveness.

Responses collected from this questionnaire will be anonymised: no individual or organisation names will be published in any research document originating from these data. This research is being conducted with approval according to Central European University's ethics requirements.

All participants will be receiving a summary of the findings of this research (please let me know via email if you do NOT want to be provided with this summary document).

Please do not hesitate to contact me if you have any questions or follow-up thoughts:

Georgina Wilson

Wilson\_georgina@phd.ceu.edu

PhD Candidate Department of Environmental Sciences & Policy

Central European University

### 1. Background Data

Name of Protected Area:

Position:

- ☐ Protected Area Manager/ Warden
- ☐ Section Manager
- ☐ Part of Protected Area Management Team
- ☐ External Consultant
- ☐ Other (please specify)

This Protected Area falls into:

- ☐ Limpopo Province
- ☐ Mpumalanga Province
- ☐ Both Limpopo & Mpumalanga Provinces

Size of Protected Area you manage (in hectares):

If your managed Protected Area is part of a larger Protected Area, what is the total size of the larger

Protected Area (in hectares)?

☐ Not Applicable

☐  Size in hectares:

Designation status of Protected Area:

☐ Not designated

☐ In process of being designated (application to MEC has been submitted)

☐ In process of being designated (documents are being prepared)

☐ Designated (please specify designation/s, relevant Act/s and years of designation/s)

The ownership structure of Protected Area could best be described as:

☐ Government

☐ Private: single owner

☐ Private: multiple owners

☐ Community (Community Property Association)

☐ Community, co-owned (please specify type of co-ownership entity, e.g. Non-Profit Organisation, government agency, private organisation)

- ☐  Other (please specify)

The governance/ management structure of this Protected Area could best be described as:

- ☐ National: South African National Parks (SANParks)
- ☐ Provincial: Mpumalanga Tourism and Parks Agency (MTPA)
- ☐ Provincial: Limpopo Economic Development, Environment and Tourism (LEDET)
- ☐ Private
- ☐ Community
- ☐ Co-management (please specify type of co-management entity)
- 
- ☐  Other (please specify)

The management authority of the Protected Area is:

- ☐ South African National Parks (SANParks)
- ☐ Mpumalanga Tourism and Parks Agency (MTPA)
- ☐ Limpopo Economic Development, Environment and Tourism (LEDET)
- ☐ Executive Committee (ExCo)
- ☐ Board of Directors (BOD)
- ☐ Community Property Association (CPA)
- ☐ Manager/warden/management team, sub-contracted by ExCo, BOD or CPA

☐  Other (please specify)

Besides the Kruger to Canyons Biosphere Region, what other landscape agreements/international designations is your Protected Area part of? E.g. Greater Limpopo Transfrontier Conservation Area (GLTFCA) / Associated Private Nature Reserves (APNR)

What best describes the main land use/s surrounding the Protected Area (multiple answers possible)?

☐ Conservation land use

☐ Agriculture

☐ Forestry

☐ Rural development

☐ Semi-urban development

☐ Mining

☐  Other (please specify)

## 2. Management Planning

Does your Protected Area have a written management plan?

- ☐ No
- ☐ Yes

Date (year only) of original formalisation of management plan for the Protected Area:

Date/s (year/s only) of revision of management plan, if applicable:

Has the management plan been signed off by the relevant authority (e.g. National Department or provincial conservation authority)?

- ☐ Yes
- ☐  No (please explain why not)

Does the Protected Area's management plan refer to "effective" management, specifically?

- ☐ Yes
- ☐ No

If no management plan, does the Protected Area have another form of guiding document? E.g. Memorandum of Understanding (MoU), Constitution

- ☐ No, no form of guiding document
- ☐  Yes (please specify)
- ☐ Not applicable, the Protected Area has a management plan

### **3. Objectives**

Does the management plan/other document have stated objectives?

- ☐ Yes
- ☐ No

Please select the categories below that apply to your Protected Area's documented objectives (select all applicable):

- ☐ Biodiversity protection and conservation
- ☐ Habitat protection and conservation
- ☐ Endangered species protection and conservation
- ☐ Ecosystem service protection/ provision
- ☐ Community development through job provision
- ☐ Community development through funding and/or provision of other resources (e.g. food, water, etc.)
- ☐ Community development through education and training
- ☐ Other forms of community development (please specify)
- ☐ Research facilitation: biodiversity-related
- ☐ Research-facilitation: community development-related
- ☐ Research-facilitation: implementation of the biosphere model/ social-ecological systems
- ☐ Research facilitation: climate change
- ☐ Climate change mitigation/ adaptation
- ☐  Other

## 4. Adaptive Management

Do you implement adaptive management in your Protected Area?



- ☐ No. I do not know what that is
- ☐ No. I know what that is but we do not implement it
- ☐ Somewhat. We do not specifically implement it, but I think it is inherent in our management practices
- ☐ Yes. We say that we implement it, but I am not sure as to the extent that we do so in practice
- ☐ Yes. We definitely implement an adaptive management process, inclusive of review of outcomes and new scientific research when planning for the next phase of management
- ☐  None of the above (please explain)

Is an adaptive management approach described in your Protected Area's management plan?

- ☐ No
- ☐ Yes
- ☐ Not applicable- no management plan

## **5. Protected Area Management Effectiveness**

Do you plan for monitoring and/or evaluation of management effectiveness of the Protected Area?

- ☐ Yes
- ☐ No

Do you implement Protected Area Management Effectiveness (PAME) monitoring and/ or evaluation?

- ☐ Yes
- ☐ No

What methods do you use to monitor and/ or evaluate Protected Area Management Effectiveness (PAME), excluding standardised PAME tools?

- ☐ None
- ☐  I use the following methods:

Do you use a standardised PAME (Protected Area Management Effectiveness) tool such as METT (Management Effectiveness Tracking Tool), or a tool of your own creation to help you monitor or evaluate management effectiveness?

- ☐ Yes
- ☐ No

Please select any of the tools below that you utilise to monitor/ evaluate effectiveness of your Protected Area (please select all applicable):

- ☐ METT-SA (Management Effectiveness Tracking Tool- South Africa)
- ☐ RAPPAM (Rapid Assessment and Prioritisation of Protected Area Management)
- ☐ Modified Threat Reduction Assessment
- ☐ IMET (Integrated Management Effectiveness Tool)
- ☐ IBA (Birdlife Important Bird Areas)
- ☐ SMART (Spatial Monitoring and Reporting Tool)
- ☐ Cooperative Agreement Terms of Reference Monitoring and Evaluation Tool
- ☐ Balance Scorecard
- ☐  Other standardised tool (please specify)
- ☐  Tool of own creation (please specify)

Please give your reason for using the standardised PAME tool/s you selected above:

If your reasoning above was because the use of a particular tool is a formal requirement (e.g. due to an

Agreement), would you still use it if it were *not* a requirement?

- ☐ Yes
- ☐ No
- ☐ Yes, but only applicable to the following tool/s from my selection:

- ☐ Not Applicable (none of the tools I selected are used due to a requirement)

Do you implement changes to management of your Protected Area after using any of the tools discussed above?

- ☐ Yes
- ☐ No
- ☐  Sometimes (please explain)

Do you communicate with other Protected Area managers in the Kruger to Canyons Biosphere Region network regarding use of PAME (Protected Area Management Effectiveness) tools?

- ☐  Yes (please describe the process briefly):
- ☐ No

Do you communicate with other Protected Area managers in the Kruger to Canyons Biosphere Region network regarding PAME (Protected Area Management Effectiveness) improvements, following the use of the PAME tools?

- ☐  Yes (please describe the process briefly):
- ☐ No

In your experience, how helpful do you find PAME (Protected Area Management Effectiveness) tools in general, on a scale of 1 - 5 (1= not at all helpful; 5= very helpful)

1                      2                      3                      4                      5

Helpful:

In your experience, how tedious do you find PAME (Protected Area Management Effectiveness) tools in general, on a scale of 1 - 5 (1= extremely tedious; 5= not at all tedious)

1

2

3

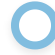

4

5

Tedious:

What is your perception of these PAME (Protected Area Management Effectiveness) tools in general?

- ☐ I like them
- ☐ I like them but I think they can be improved or streamlined
- ☐ I neither like nor dislike them
- ☐ I dislike them but I don't know of a better way to monitor/evaluate PAME
- ☐ I dislike them and I feel there are better ways of monitoring/evaluating PAME

## 6. General

Do you have a suggestion/some suggestions for a better way of monitoring and evaluating Protected Area Management Effectiveness in order to continually improve the Protected Area network's effectiveness?

Do you think there is the potential for research on Protected Area Management Effectiveness (PAME) that would assist you in monitoring or evaluating effectiveness?

- ☐ Yes
- ☐ No

What kind of research on Protected Area Management Effectiveness would you find helpful to assist you in monitoring or evaluating the effectiveness of your Protected Area?
